# Homologous locus pairing is a transient, diffusion-mediated process in meiotic prophase

Trent A. C. Newman<sup>a,1</sup>, Bruno Beltran<sup>b,1</sup>, James M. McGehee<sup>a,2</sup>, Daniel Elnatan<sup>a,2</sup>, Cori K. Cahoon<sup>a,2</sup>, Michael R. Paddy<sup>a</sup>, Daniel B. Chu<sup>a</sup>, Andrew J. Spakowitz<sup>b,c,d,3</sup>, and Sean M. Burgess<sup>a,3</sup>

<sup>a</sup>Department of Molecular and Cellular Biology, University of California, Davis, Davis, California; <sup>b</sup>Biophysics Program, Stanford University, Stanford, California; <sup>c</sup>Department of Chemical Engineering, Stanford University, Stanford, California; <sup>d</sup>Department of Materials Science & Engineering, Stanford University, Stanford, California

## Abstract

1 The pairing of homologous chromosomes in meiosis I is essential  
2 for sexual reproduction and is mediated, in part, by the formation  
3 and repair of Spo11-induced DNA double strand breaks (DSBs). In  
4 budding yeast, each cell receives ~150-200 DSBs, yet only a fraction  
5 go on to form crossover products. How and why the cell initially co-  
6 ordinates so many interactions along each chromosome is not well  
7 understood. Using a fluorescent reporter-operator system (FROS),  
8 we measure the kinetics of interacting homologous loci at various  
9 stages of meiosis. We find that while tagged loci undergo consid-  
10 erable motion throughout prophase I, they are constrained in how  
11 far they can diffuse from their homolog pair. This effective tether-  
12 ing radius decreases over the course of meiosis in a DSB-dependent  
13 manner. We develop a theoretical model that captures the biological  
14 contributions of centromere attachment to the nuclear envelope, ho-  
15 molog pairing, and nuclear confinement. With this model, we demon-  
16 strate that the experimentally observed heterogeneity in single-cell  
17 behavior and the effective tethering between loci is captured for two  
18 polymers forming randomly-spaced linkages. The small number of  
19 connections required to reproduce our data demonstrates that a sin-  
20 gle linkage site between homologous chromosomes can constrain  
21 the movement of loci up to hundreds of kilobases away.

homologous chromosome pairing | meiosis | *tetO*/TetR-GFP | polymer physics

1 Meiosis is a cellular program that creates haploid gametes from  
2 diploid parent cells. This chromosome reduction occurs by  
3 two chromosome segregation events that follow one round of DNA  
4 replication. In meiosis I prophase, homologous chromosomes pair  
5 and recombine using homologous recombination before separating at  
6 anaphase I. Errors in pairing can lead to chromosome nondisjunction  
7 and are a major contributor to birth defects, such as Down syndrome  
8 and miscarriages in humans (1, 2).

9 In yeast, the progression of pairing is often measured by mon-  
10 itoring whether individual homologous loci are colocalized. Loci  
11 start off colocalized prior to meiotic DNA replication in the G0 state  
12 (Fig. 1a). This colocalization, often referred to as pre-meiotic pairing,  
13 is disrupted during the course of meiotic S-phase and restored during  
14 meiosis prophase I (3, 4, 5, 6) (see Fig. 1a-c and Fig. 1d). While  
15 the mechanism that promotes colocalization in premeiotic cells is  
16 not well understood, it is known that the inter-homolog linkages that  
17 promote colocalization during prophase I depend on the formation  
18 and repair of DSBs created by Spo11 (7, 8, 9). For any given meiosis,  
19 any sequence has the “potential” (albeit not all equally) to experience  
20 a DSB (8). However, only 94 DSBs (2-10 per chromosome) go on  
21 to form crossovers (10). It is not known if these excess DSBs are  
22 necessary to mediate pairing or if the smaller number that go on to  
23 form COs are sufficient.

24 The sequence of colocalization at G0, separation during S-phase,  
25 and reestablishment of colocalization in prophase I is supported by  
26 data generated using various physical assays (11), including fluores-

27 cence *in situ* hybridization to measure the spatial proximity of pairs  
28 of loci in fixed spread chromosome preparations (3, 12), a chromo-  
29 some collision assay to measure the relative frequency of DNA/DNA  
30 contacts between loci using *Cre/loxP* site-specific recombination (13),  
31 chromosome conformation capture (14, 15), and one-spot two-spot  
32 measurements using fluorescence reporter operator systems (FROS)  
33 in living cells (5, 16). While each method has its limitations (17, 18),  
34 an overall pattern emerges. Full-length homolog juxtaposition seems  
35 to rely on a large number of interactions between multiple loci along  
36 each chromosome (19).

37 Existing measurements provide only static snapshots of popula-  
38 tions of cells, and it has not been possible to infer whether homologous  
39 loci are brought together in the first place by a processive motor or  
40 simply via thermal fluctuations. It has been proposed that homologs  
41 may undergo many, transient interactions throughout prophase (3, 19).  
42 However, static measurements are unable to distinguish what fraction  
43 of the colocalized homologous pairs are directly interacting, via some  
44 form of stable local linkage (as in Fig. 2d), and how many are merely  
45 diffusing past each other (as in Fig. 2c).

46 In order to measure any active forces pulling together homologous  
47 loci, and to differentiate between the stably linked and freely diffusing  
48 loci, we used FROS-based tags to track pairs of homologous loci  
49 that are known to colocalize with high probability. Snapshots of the  
50 position of these loci in 3D space over time in individual live cells

## Significance Statement

Meiosis is essential for sexual reproduction, and homologous chromosome pairing is a critical step in this process that must be reliably achieved. We measure the dynamics of homologous loci throughout prophase I of meiosis, demonstrating the transient nature of homolog contacts and heterogeneity in single-cell behavior. We develop a minimal model containing only the basic polymer physics of DNA but is sufficient to reproduce the observed behavior. We show that it only takes a handful of homologous linkages per chromosome to facilitate pairing, demonstrating that a single tethered locus can drastically restrict the diffusion of DNA tens to hundreds of kilobases away. These results demonstrate the central role of random diffusion and polymer physics in facilitating chromosome pairing in meiosis.

T.A.C.N., B.B., J.M.M., C.K.C., D.E., M.R.P., D.B.C., A.J.S., and S.M.B. designed the research; T.A.C.N., B.B., J.M.M., C.K.C., D.E., A.J.S., and D.B.C. collected data; T.A.C.N., B.B., J.M.M., C.K.C., D.E., A.J.S., and S.M.B. analyzed the data; T.A.C.N., B.B., J.M.M., A.J.S., and S.M.B. wrote the paper.

The authors declare no conflict of interest.

<sup>1</sup>T.A.C.N. and B.B. contributed equally to this work. <sup>2</sup>J.M.M., D.E., and C.K.C. contributed equally to this work.

<sup>3</sup>To whom correspondence should be addressed. E-mail for A.J.S.: ajspakow@stanford.edu. E-mail for S.M.B.: smbουργess@ucdavis.edu.

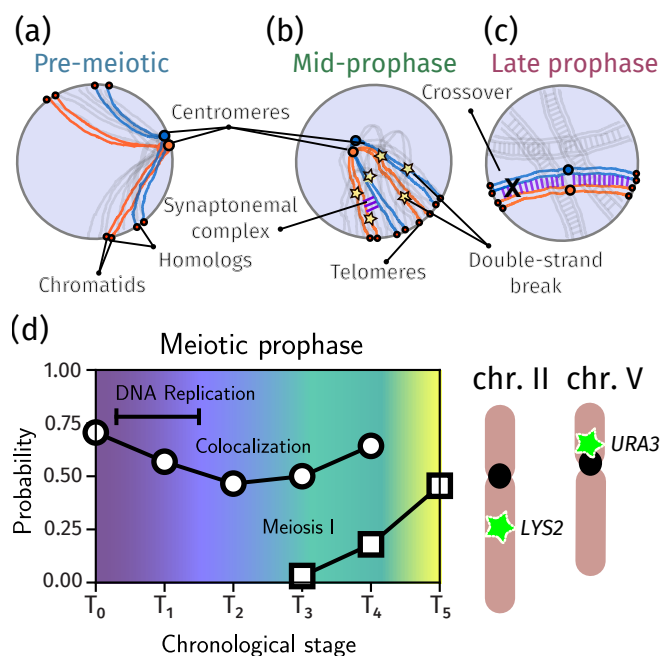

**Fig. 1.** A schematic of the relative timing of the chromosome events of meiosis in SK1 strains of budding yeast (3, 4, 5, 13, 20, 21, 22). (a) Chromosomes in pre-meiotic cells arrested in G0 are in the Rab1 configuration with centromeres tethered to the nuclear periphery (23) and homologous chromosomes form loose associations (3, 24) (b) Early- to mid-prophase is marked by dissolution of the Rab1 configuration, DSB formation, initiation of synapsis (20, 25), and reorientation to form a bouquet where telomeres cluster to one side of the nucleus (26). (c) Late prophase is marked by the end-to-end alignment of homologs by the synaptonemal complex. (d) Fraction of cells over time that demonstrate colocalization of the *URA3* locus and completion of meiosis I (MI). The x-axis measures the time  $T_i$  ( $i$  hours) after induction of sporulation that the cells in question were prepared for imaging. Pre-meiotic colocalization is lost during DNA replication and is restored during meiotic prophase, culminating in the full-length alignment of homologs joined by the synaptonemal complex (SC) Soon afterwards, cells begin to complete meiosis I (MI). (e) The relative positions along the chromosome of our tagged loci are shown. These loci were chosen to probe the dependence of colocalization on centromere proximity.

51 were collected *in vivo* in the G0 state prior to DNA replication and in  
52 cells transiting through prophase I to anaphase I.

53 Any mechanism to bring together or stabilize the loci *in vivo* must  
54 either utilize or overcome the thermal motion of the DNA polymer.  
55 Thus, we compare our data to a minimal model, designed to cap-  
56 ture only the basic, well-established physical properties of meiotic  
57 chromatin. We then modify this baseline model to include linkages  
58 between randomly-chosen homologous sites. While a model with  
59 randomly chosen linkage sites only rarely produces a configuration  
60 where the labeled loci are directly linked, distal linkages result in  
61 the measured loci being effectively tethered together (see Fig. 2c-d)  
62 by a spring-like force. Because a small handful of DSBs per chromo-  
63 some are known to mature into stable CO products (10) and will  
64 contribute such a spring-like tethering force, any measurement of the  
65 force between homologous loci must acknowledge this effect.

66 Comparing the experimental data to our polymer model suggests  
67 that the small number of linkages caused by COs (27) (or recombi-  
68 nation intermediates that will become COs), are sufficient to explain  
69 the ubiquitous colocalization we observe *in vivo*. Even though the  
70 nearest linkage site is often tens or hundreds of kilobases away from  
71 our tagged loci, our theory is still able to reproduce the dynamics  
72 of the tagged loci throughout meiosis, suggesting that these loci are  
73 not directly interacting, but are merely tethered together indirectly by

74 distal homologous interactions (as in Fig. 2b-c). Our results suggest a  
75 handful of bona fide Spo11-dependent linkages per chromosome are  
76 sufficient to drive end-to-end homolog juxtaposition.

## 77 Results

**78 Live imaging reveals physical tethering between homologous loci.** Our study used yeast strains containing chromosomes  
79 carrying FROS tags comprised of chromosomally-integrated *tet* oper-  
80 ator arrays of 112 repeats bound by fluorescent TetR-GFP protein (5).  
81 Operators were inserted at either the *URA3* locus—which is on the  
82 short arm of chr. V near the centromere, or the *LYS2* locus—which is  
83 in the center of the long arm of chr. II (see Fig. 1).  
84

85 Cells were cultured for synchronized progression through meiotic  
86 prophase as described in Ref. (28). Briefly, cells were grown in  
87 YP media containing acetate for arrest in G0. Thereafter, cells  
88 were transferred to sporulation medium and aliquots of cells were  
89 removed from the culture every hour ( $T_M = T_0, T_1, \dots$ ) and imaged  
90 over a 25 minute period at 30 second intervals ( $t_i = 0, 30, \dots, 1500$ ).  
91 Following extensive quality control (see Supplementary Information),  
92 the positions  $\vec{r}_1(t_i)$  and  $\vec{r}_2(t_i)$  of the two fluorescent foci (or the  
93 single paired focus) was determined for slides with at least 10 “ok” cells  
94 present, as seen in Fig. 3.

95 Since Spo11-dependent homolog colocalization begins shortly  
96 after 3 hours post transfer to sporulation media, we first verified  
97 that our trajectories exhibited evidence of tethering between the two  
98 homologous loci at  $T_3$ . This was done by comparing the height  
99 of the plateau of the mean-square displacement (MSD) curves of  
100 individual loci to the mean-square change in distance (MSCD) curves  
101 of those same loci. Following (29), we define the MSCD to be the  
102 mean-squared change of the vector connecting the two loci,  $\Delta\vec{r} =$   
103  $\vec{r}_2(t_i) - \vec{r}_1(t_i)$ . For unlinked loci, we would expect the MSD and  
104 MSCD curves to plateau to a comparable value (approximately the  
105 square of the confinement radius). Therefore, a MSCD curve which  
106 plateaus to a lower level than the MSD curve is indicative of some  
107 level of linkage between the two loci. Supplementary Information  
108 (Fig. S2) provides the comparison between MSD and MSCD for the  
109 *URA3* and *LYS2* loci, confirming the MSCD curves are substantially  
110 smaller than the MSD values.

111 Figure 4 shows time-averaged, single-cell MSCDs for a random  
112 subsample of cells from a single movie of *URA3* at  $T_5$ . We compute  
113 the time average for a single trajectory as

$$114 \left\langle \Delta\vec{r}^2(t) \right\rangle_{ta} = \left\langle (\Delta\vec{r}(\tau+t) - \Delta\vec{r}(\tau))^2 \right\rangle_{\tau}, \quad [1]$$

115 where  $\langle \cdot \rangle_{\tau}$  indicates the averaging is performed over all possible val-  
116 ues of  $\tau$ . Because our fluorescent tags are a single color, whenever

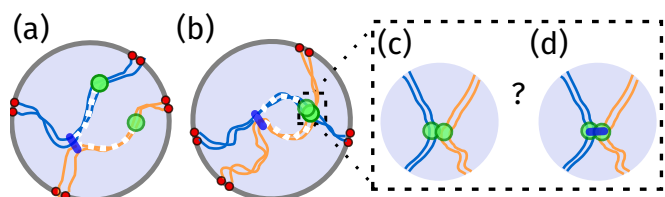

**Fig. 2.** Schematic illustrating our definition of “tether” and “linkage”. (a) An example of a distal linkage (blue), far upstream of the actual tagged locus (green). The length of DNA highlighted in white is the tether length. The longer the tether, the weaker the spring force pulling together the tagged loci. In this example, while the loci are tethered together, they happen to not be colocalized. (b) Here, the two tagged loci are colocalized. However, their colocalization can occur either because the loci have transiently diffused into close spatial proximity (c) or because a linkage has formed at or near the tagged loci (d).

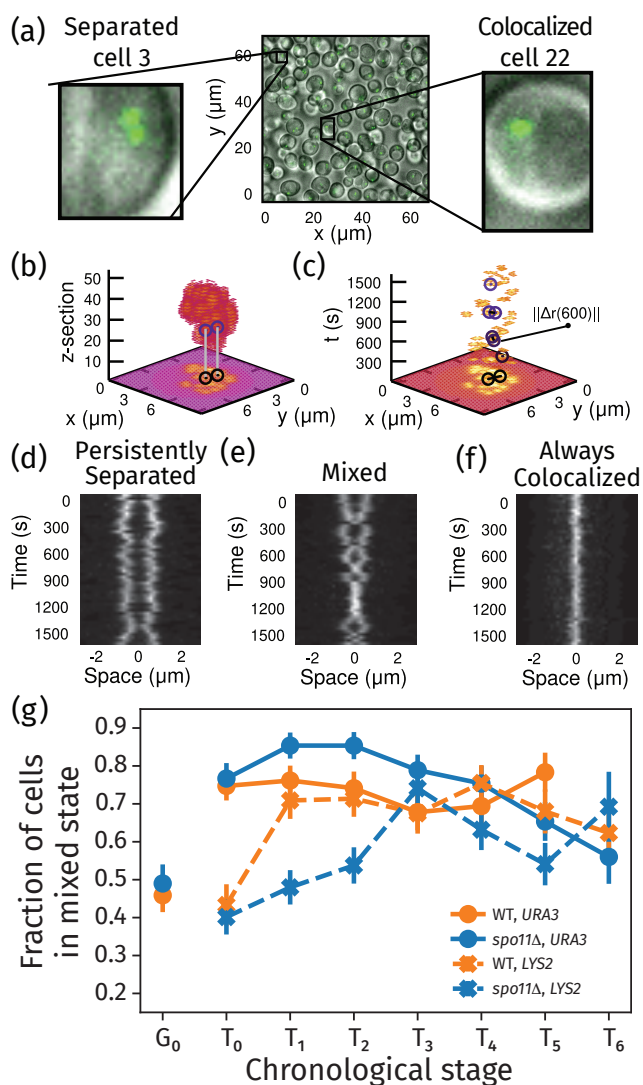

**Fig. 3.** (a) A typical field of cells, highlighting example cells showing either two spots (left) or one spot (right). (b-c) Maximum intensity projections (MIPs) of the relative positions of fluorescent foci at 30 s intervals. In (b), the vertical axis corresponds to a z-stack (with step size  $2/15 \mu\text{m}$ ). For each x and y coordinate, the maximum value over all time points for that z-stack is shown. In (c), the vertical axis represents time (t, in seconds), and the projection is instead performed over z-stacks. The positions of the loci and the distance between them is highlighted for select time points. (d-f) kymographs showing the distance between the loci in a single cell over the 25 minute imaging period. Each horizontal slice in the kymograph shows the fluorescence intensity along the line joining the centers of the two loci in a single frame. Example of cells where the loci are separated (d), or colocalize (f) for every frame. The cell shown in (e) undergoes several transitions between the two states. (g) Fraction of cells in the mixed state versus chronological time through meiosis for the *URA3* and *LYS2* loci in wild-type and *spo11Δ* cells. Plot was made from aggregating all available data for each meiotic stage. The error is the standard error of the mean with the sample count set to the number of trajectories (Supp. File 2). The error is the standard error of the mean with the sample count set to the number of trajectories.

the bottom plot (b) shows the behavior of *spo11Δ* cells. These plots show results from 25 randomly selected cells (light) along with 5 randomly selected cells (bold) to demonstrate the cell-to-cell heterogeneity and individual-cell behaviors. The trajectories exhibit a combination of power-law transport ( $\text{MSCD} \sim t^B$ ) and confined motion (constant MSCD). To clearly demonstrate this behavior, the Supplementary Information (Figs. S5 and S6) provides an analysis of this behavior at  $T_0$  for both *URA3* and *LYS2* loci in the wild-type strain. This analysis includes a fit of each single-cell MSCD to a function  $\text{MSCD} = \min(A t^B, C)$ , which exhibits an initial power-law behavior followed by a plateau. From this analysis, the distribution of values of the power-law slope  $B$  ranges from about zero to 0.5, with an average value of  $B = 0.24$  (see Supplementary Information for details). Figure 4 includes power-law scaling behaviors associated with confined motion (zero slope) and the experimentally determined power-law scaling (slope  $B = 0.24$ ) as guides.

The MSCD behaviors of wild-type (a) and *spo11Δ* (b) at  $T_5$  show distinct differences that reflect their underlying biological states. At this late stage of prophase I, we anticipate that most cells are no longer in the Rab1 configuration. The *spo11Δ* cells show a clustering of the MSCD plateau between  $1 \mu\text{m}^2$  and  $2 \mu\text{m}^2$ , which we associate with confined motion within the nuclear environment. Notably, several individual cells in Fig. 4b exhibit a significantly lower MSCD plateau, which are likely due to the rare cases of cells remaining in the Rab1 configuration at  $T_5$  or cells where centromeres are attached to spindle

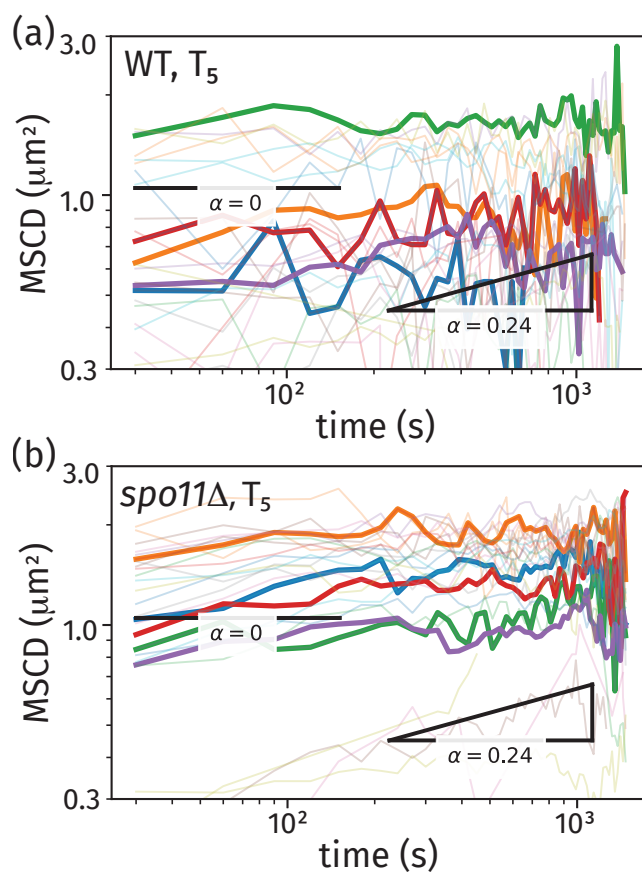

**Fig. 4.** Single-cell MSCDs for *URA3* trajectories at  $T_5$ . These plots show results from 25 randomly selected cells (light) along with 5 randomly selected cells (bold) for wild-type cells (a) and *spo11Δ* cells (b). Each plot includes two power-law scaling behaviors associated with confined motion (slope  $\alpha = 0$ ) and unconfined polymer motion (slope  $\alpha = 0.5$ ).

the loci are within  $\approx 250\text{nm}$  of each other, their locations are indistinguishable due to overlap of their respective point spread functions. Such time points were omitted from all MSCD calculations, meaning that we are explicitly computing the dynamics from movie frames where the loci are non-overlapping. The Supplementary Information (Fig. S3 for *URA3* and Fig. S4 for *LYS2*) provides plots of the single-cell MSCDs for times  $T_0$  to  $T_5$  for wild-type and *spo11Δ* strains.

The top plot of Fig. 4a shows results from wild-type cells, and

150 fibers and about to go through anaphase. The wild-type cells in  
151 Fig. 4a show a much larger degree of heterogeneity in MSCD behavior.  
152 We proceed to interpret this heterogeneity based on the physical  
153 constraints associated with the progression of linkages between the  
154 homologous chromosomes throughout prophase I.

155 **Tethering of homologous loci through random linkages can**  
156 **recreate the range of confinement observed experimentally.**  
157 Many of the single-cell trajectories in Fig. 4 exhibit confined motion,  
158 indicated by the MSCD exhibiting a long-time plateau. The hetero-  
159 geneity in these plateau values suggest cell-to-cell variability in the  
160 dominant contributions to the physical confinement. We identify three  
161 major contributors that confine the relative motion of the homologous  
162 chromosomes: confinement within the nucleus (1), centromere linkage  
163 for cells in the Rabl configuration (2), and linkages between the  
164 homologous chromosomes as prophase I progresses (3). We establish  
165 a theoretical model of homolog pairing to interpret the experimentally  
166 observed behavior with the goal of predicting the impact of these  
167 three sources of confinement on chromosome motion during prophase  
168 I.

169 Previous work demonstrates that chromosomal behaviors in living  
170 cells, including bacteria (30, 31, 32), mammalian cells (33), and  
171 yeast nuclei (32, 34, 35, 36), are captured by polymer-physics models.  
172 These works are generally based on the Rouse model (37). In this  
173 model, the polymer chain is represented as a linear chain of beads  
174 connected by springs, and the motion is driven by random Brownian  
175 forces. Several treatments of *in vivo* dynamics extend the Rouse  
176 model to include the influence of viscoelasticity, which we identify  
177 as the viscoelastic Rouse model (30, 31, 32, 32, 33), leading to a  
178 significant reduction in the power-law scaling of various metrics (e.g.  
179 MSD, MSCD, and the velocity autocorrelation function).

180 The original Rouse model exhibits a monomer MSD with power-  
181 law scaling of  $t^{1/2}$ , and the viscoelastic Rouse model for a fluid with  
182 scaling exponent  $\alpha$  (i.e. particle motion exhibits  $\text{MSD} \sim t^\alpha$ ) leads  
183 to a monomer MSD with scaling  $\text{MSCD} \sim t^{\alpha/2}$ . Given the average  
184 power-law scaling for our experimental MSCDs having a scaling  
185  $B = 0.24$ , our results are consistent with a viscoelastic Rouse model  
186 with  $\alpha = 2B = 0.48$ .

187 We develop a polymer-physics model of homologous chromo-  
188 somes that extends the viscoelastic Rouse polymer by adding several  
189 key physical contributions. First, we confine two Rouse polymers  
190 within a sphere of radius  $a$ , representing the nuclear confinement.  
191 Second, we link the two polymers at the centromere position (chosen  
192 appropriately for the specific chromosome being modeled), if the  
193 cell is in the Rabl configuration. Third, we model the progression of  
194 homolog pairing by adding linkages between the two polymers with  
195 increasing average number as pairing progresses. Our model therefore  
196 has the following physical parameters: the Kuhn length  $b$  of the poly-  
197 mer chains, the spherical radius  $a$ , the rate constant for transitioning  
198 from the Rabl configuration  $k_{\text{Rabl}}$ , the average number of linkages  
199  $\mu$  (varies with time after sporulation), and the diffusion constant  $D_0$   
200 for polymer segmental motion. The polymer lengths and segmental  
201 positions of the tracked loci and centromeres are determined from the  
202 genomic properties.

203 Experimental behavior under various conditions permits us to  
204 isolate and determine individual physical parameters in our model.  
205 Here, we provide an overview of the procedure used to determine these  
206 parameters. The behavior of the MSCD at  $T_0$  (just after induction of  
207 sporulation) is dominated by the centromere linkage for the *URA3*  
208 locus on chromosome V due to its close proximity to the centromere.  
209 We predict the MSCD plateau at time  $T_0$  to be  $\text{MSCD}_\infty(T_0)$  based on  
210 the approach to its stable asymptotic value. Using our model applied

211 to chromosome V in the Rabl configuration, we predict the plateau in  
212 the MSCD versus Kuhn length. This analysis is used to determine the  
213 Kuhn length to be  $b = 250$  nm.

214 As the cells progress through prophase I, we assume the change in  
215 the MSCD of the *spo11Δ* strain arises from progressive transition from  
216 the Rabl configuration. We evaluate the MSCD plateau at each time  
217 from  $T_0$  to  $T_6$ . We then fit this data to a function of the form  $\text{MSCD}_\infty =$   
218  $\text{MSCD}_\infty(T_0) \exp(-k_{\text{Rabl}}t) + \text{MSCD}_\infty(T_\infty) [1 - \exp(-k_{\text{Rabl}}t)]$ , where  
219  $k_{\text{Rabl}}$  is the rate constant for transition from the Rabl configuration and  
220  $\text{MSCD}_\infty(T_\infty)$  is the MSCD plateau value at long time (i.e. when all  
221 cells transition out of the Rabl configuration). Note,  $\text{MSCD}_\infty(T_0)$  is  
222 uniquely determined from the  $T_0$  MSCD plateau. From this analysis,  
223 we determine  $k_{\text{Rabl}} = 0.605 \text{ h}^{-1}$ , resulting in an average time for  
224 centromere detachment of 1.65 h (between  $T_1$  and  $T_2$ ).

225 From the fitted value of  $\text{MSCD}_\infty(T_\infty) = 1.74 \mu\text{m}^2$ , we model the  
226 MSCD plateau using our theoretical model of two flexible polymers  
227 confined within a sphere of radius  $a$  with their ends attached to the  
228 sphere surface (see Supplementary Information for details). Using  
229 this model, we determine the best fit sphere radius to be  $a = 1.59 \mu\text{m}$ .

230 We then use the MSCD plateau values from the wild type strain for  
231 *URA3* to determine the mean number of linkages throughout prophase  
232 I to be  $\mu = 0.08$  at  $T_3$ ,  $\mu = 1.27$  at  $T_4$ , and  $\mu = 3.36$  at  $T_5$ . We predict  
233 the number of linkages between  $T_0$  and  $T_3$  to be negligible, and the  
234 behavior is dominated by centromere linkage during this early stage  
235 of prophase I. Similar analyses for the *LYS2* locus yields the mean  
236 number of linkages at  $T_5$  to be  $\mu = 1.27$ , and  $\mu = 2.06$  at  $T_6$  (with  
237  $\mu = 0$  at earlier times).

238 Figure 5 shows theoretical predictions for the MSCD for simulated  
239 "cells" that are generated by adding a Poisson-distributed number of  
240 "linkage sites" located at random positions along the homologous  
241 chromosomes. Figure 5a shows 5 linkage diagrams for simulated  
242 "cells", where the blue sticks identify randomly selected linkages.  
243 These five "cells" coincide with the five bold MSCD curves in Fig. 5b.  
244 In addition, Fig. 5b shows predictions for 25 simulated "cells" as light  
245 curves (same number of trajectories as presented in Fig. 4), providing  
246 a picture of both the individual "cell" behavior and the distribution  
247 within the ensemble. These smooth MSCD curves generated by  
248 our theory predict the behavior from a time average over random  
249 trajectories (i.e. driven by Brownian motion) for the fixed linkages of  
250 each "cell".

251 The two copies of our tagged loci are connected by an effective  
252 tether whose length is dictated by the distance to the nearest linkage  
253 sites, which we highlight in Fig. 5a using bold white for the nearest  
254 linkage and thin white for the next-nearest linkage (if applicable). If  
255 the tagged locus has a linkage on only one side (e.g. cells 1 and 4  
256 in Fig. 5a), the tagged loci are tethered together by a linear chain. If  
257 there are linkage sites on both sides of the tagged locus (e.g. cells 2,  
258 3, and 5 in Fig. 5a), the tagged loci are isolated within an effective  
259 "ring" polymer. Assuming these topologies are fixed, we analytically  
260 compute the MSCD of the tagged loci by treating them as beads  
261 connected by Rouse polymers of appropriate lengths and topology  
262 (see Supplementary Information for details on our analytical theory  
263 for the MSCD of linear and ring polymers).

264 Figure 5b shows analytical MSCD curves for the 5 "cells" shown  
265 schematically in Fig. 5a. The effective tethering radii (MSCD plateau  
266 heights) for the randomly linked chromosomes span a similar range as  
267 the wild-type data in Fig. 4a. This heterogeneity in predicted behavior  
268 arises from variability in the location of the nearest linkage. Instances  
269 where a randomly positioned linkage is in close genomic proximity to  
270 the tagged locus (e.g. cell 4) result in low values of the MSCD plateau.  
271 Variability in the distance to the nearest linkage causes the MSCD

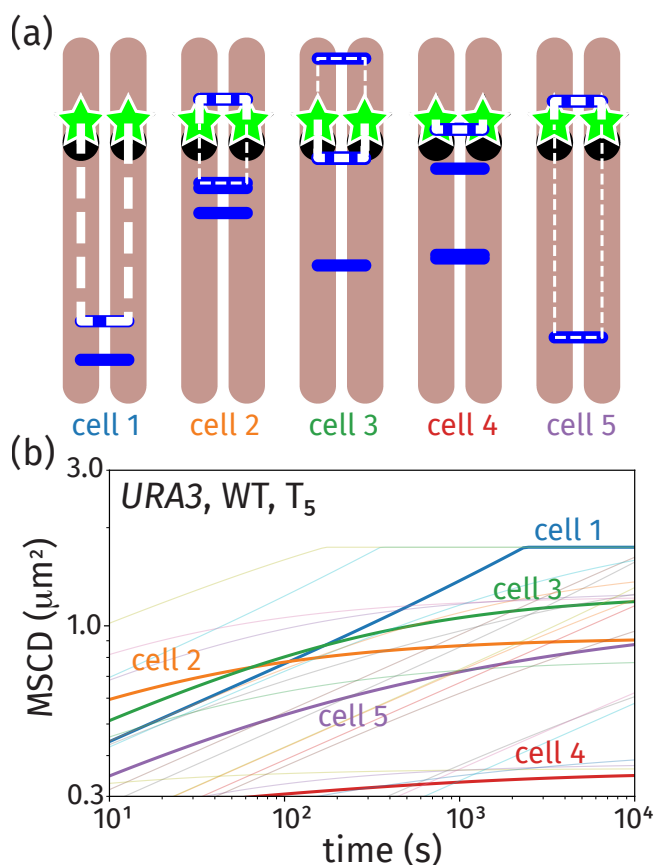

**Fig. 5.** Theoretical predictions for the MSCD based on our random-link model for homolog pairing coincident with *URA3* trajectories at  $T_5$ . Five individual cell linkage diagrams (a) result in the five bold MSCD curves in the plot (b). The MSCD plot shows 25 additional realizations (light) to demonstrate the heterogeneity in the MSCD behavior.

include Rab1 transition and progressive linkage formation (based on analyses from the previous section). The values of the fitted subdiffusion coefficient are provided in the Supplementary Information in Fig. S7. We find that the early stage data is better fit by a lower diffusivity, and this diffusivity becomes progressively larger as the cells progress through prophase I. Figure 6 shows results of our theoretical model at each time as the solid curves based on 100,000 realizations of our theoretical “cells” whose individual contributions are demonstrated in Fig. 5. The random Brownian motion from each trajectory and cell-to-cell heterogeneity from linkage positioning is smoothed out from the combination of ensemble and time averaging within the theory. In our determination of the theoretical average, we exclude MSCD values that are below the detection threshold of  $0.0625 \mu\text{m}^2$  to aid comparison with our experimental results that also have this positive bias.

Figure 6 includes arrows to clarify the progression of behaviors throughout meiosis. Notably, the wild-type results in Fig. 6a and c exhibit a non-monotonic behavior, which contrasts the monotonic behavior in the *spo11Δ* data in Figs. 6b and d. At early times, the MSCD is substantially reduced due to two effects: the large fraction of cells in the Rab1 configuration and the reduced subdiffusion coefficient at this early stage. The MSCD increases through this early stage as more cells no longer are linked at the centromere and the subdiffusion coefficient progressively increases. This gradual increase is consistent with previous work (4) that reports significant heterogeneity in the time between induction of sporulation and entry into meiosis, despite the use of synchronized cell cultures. As the centromere dissociates from the nuclear envelope in more and more cells—leaving the loci free to diffuse throughout the nucleus—the average plateau level would be expected to rise concomitantly. Furthermore, the increases in the subdiffusion coefficient is consistent with the observation of rapid prophase movement at the telomeres (38, 39, 40). Notably, the increase in the subdiffusion coefficient is more dramatic for the *URA3* locus than the *LYS2* locus (see Supplementary Information, Fig. S7), which is likely due to the closer proximity of the *URA3* locus to a telomere on chromosome V than the corresponding distance to a telomere for *LYS2* on chromosome II.

At  $T_3$ , around when we expect bona fide homologous recombination to begin, the average confinement radius for the *URA3* locus begins to decrease again (see Fig. 6a). Similar behavior is seen for the *LYS2* locus in Fig. 6c, but the inversion is first quantifiable at  $T_4$ . In both cases, the MSCD decreases as more linkages are formed between the homologous chromosomes. This reduction in the MSCD and MSCD plateau is only expected in wild-type cells, as the *spo11Δ* mutants do not form linkages arising from Spo11-induced double-strand breaks. This is generally true in our experimental data in Figs. 6b and d. However, time  $T_5$  for *URA3* locus in the *spo11Δ* mutant (see Fig. 6b) exhibits a reduced MSCD before going back to the terminal MSCD plateau at time  $T_6$ .

To verify that the observed behaviors in Fig. 6 is specific to homologous chromosomes and not simply due to large-scale nuclear compaction, we repeated our analyses in a strain where our FROS tag is integrated in only one homolog of chromosomes V and II at the *URA3* and *LYS2* loci. In these cells, the MSCD plateau level instead increases starting at  $T_3$  (see Supplementary Information), confirming that the confinement we see beginning at  $T_3$  is specific to homolog pairs.

**Homologous interactions remain transient throughout meiosis.** Our single-cell measurements permit us to evaluate the kinetics of transient interactions between loci. In Fig. 7, we report the fraction of time the two loci exist in a colocalized state (i.e. their point-

272 curves to vary in their magnitude, and there are instances where the  
273 nearest linkage is sufficiently far that the nuclear confinement dictates  
274 the MSCD plateau, as in cell 1 in Fig. 5. Prior to the plateau, each  
275 MSCD curve in Fig. 5 exhibits a transient power-law scaling of  $t^{0.24}$ ,  
276 as dictated by the viscoelastic Rouse model.

277 **Progression of behavior through prophase I dictated by**  
278 **centromere release and linkage formation.** The individual-cell  
279 MSCDs at  $T_5$  in Figs. 4 and 5 demonstrate the late-stage behavior,  
280 after transition from the Rab1 configuration. We now analyze the  
281 ensemble-averaged MSCD at each meiotic stage ( $T_M$ ) to demonstrate  
282 how the biophysical contributions to the dynamics evolve over the  
283 course of meiosis. This progression is marked by two offsetting events:  
284 release of the centromere and formation of Spo11-dependent linkages.  
285 We use a dual time-and-ensemble average MSCD, computed as

$$286 \left\langle \Delta \vec{r}^2(t) \right\rangle_{\text{ens}} = \left\langle (\Delta \vec{r}_j(\tau+t) - \Delta \vec{r}_j(\tau))^2 \right\rangle_{j,\tau}, \quad [2]$$

287 where  $\Delta \vec{r}_j$  refers to the distance between the two loci in the  $j$ th cell,  
288 and the average is taken over all cells imaged at each  $T_M$  (across  
289 multiple biological replicates).

290 In Fig. 6a and Fig. 6b, we show the ensemble-average MSCD  
291 curves for wild-type and *spo11Δ* strains, respectively, for the *URA3*  
292 loci, and Fig. 6c and Fig. 6d are the corresponding plots for the *LYS2*  
293 loci. From this experimental data, we fit the subdiffusion coefficients  
294  $D_0(T_M)$  at each time using results from our theoretical model, which

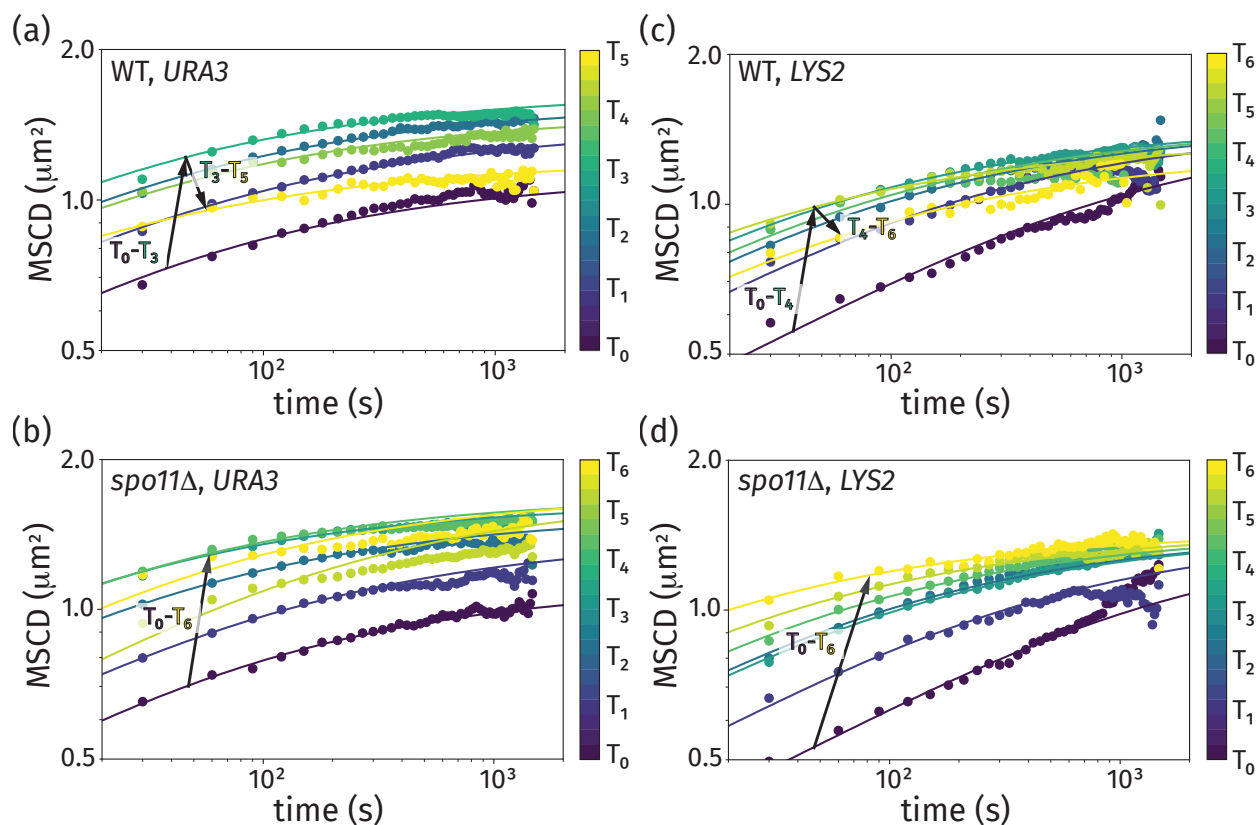

**Fig. 6.** Time- and ensemble-averaged MSCDs at different times after induction of sporulation, for wild-type strain tagged at the *URA3* locus (a), *spo11Δ* strain tagged at the *URA3* locus (b), wild-type strain tagged at the *LYS2* locus (c), and *spo11Δ* strain tagged at the *LYS2* locus (d). Theoretical predictions from our model are included for the fitted diffusivities.

356 spread functions are not distinguishable with a separation of less than  
 357 250 nm), averaged over all cells imaged and over all frames of each  
 358 movie. In *spo11Δ* mutants (both for the *URA3* and *LYS2* loci), the  
 359 fraction of time colocalized continues to decrease over time. However,  
 360 the wild-type cells exhibit a non-monotonic trend in the fraction of  
 361 time colocalized, as the loci spend more time together during the  
 362 late stage of prophase I (times  $T_3$  to  $T_6$ ). As previously reported by  
 363 others (5, 41), our results exhibit a fraction of one-spot cells that  
 364 increases during this late stage (but never reached 100%). Due to the  
 365 static nature of this metric, previous studies have been unable to  
 366 distinguish between an increased frequency of transient colocalization  
 367 on the one hand and the formation of stable interactions in a fraction  
 368 of the cells on the other.

369 Using the dynamic information in our measurements, we further  
 370 classified entire trajectories as being persistently separated—i.e.  
 371 never forming—and persistently colocalized—remaining in contact  
 372 throughout the movie. Moreover, by observing trajectories over time,  
 373 we identified a third category of “mixed” trajectories, where the cell  
 374 was observed to transition in or out of a colocalized state during the  
 375 25 minute period. These three states are easily distinguishable in  
 376 locus-separation kymographs (see Fig. 3, and Supplementary Informa-  
 377 tion Fig. S15-19). From the “mixed” trajectories, we determine the  
 378 distribution of dwell times in the colocalized and separated states.

379 Figure 8 shows the distribution of dwell times for the loci to be in  
 380 the colocalized and separated states for the *LYS2* locus (see Supple-  
 381 mentary Information, Fig. S9 for corresponding plots for *URA3*). The  
 382 experimental data exists in the colocalized state if the tagged loci are  
 383 within 250 nm of each other; otherwise, the loci are in the separated

state. This data demonstrates the transient nature of the colocalization  
 of the loci throughout the observation for both the wild-type (Figs. 8a  
 and c) and *spo11Δ* (Figs. 8b and d) strains. These plots are shown on  
 a log-log scale, which clearly demonstrates the power-law nature of  
 the dwell time distributions. This behavior is clearly distinguishable  
 from an exponential distribution (red curve in Fig. ??a) that typically  
 arises in reaction processes with a single governing time-constant for  
 the transition. Such power-law distributions arise in diffusion-limited

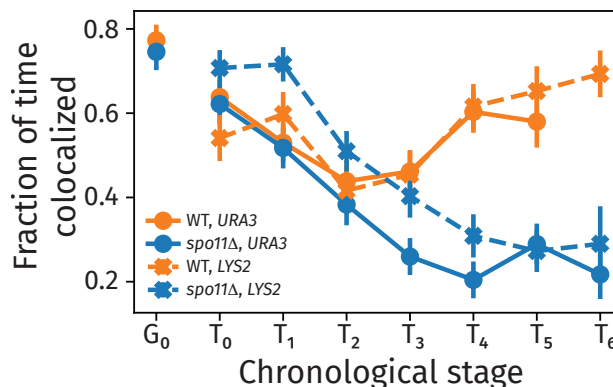

**Fig. 7.** The fraction of time at each stage of meiosis ( $T_M = T_0, T_1, \dots$ ) that are in a colocalized state for each of the two loci and strains examined. Plot was made from aggregating all available data for each meiotic stage. The error is the standard error of the mean with the sample count set to the number of trajectories (Supp. File 2).

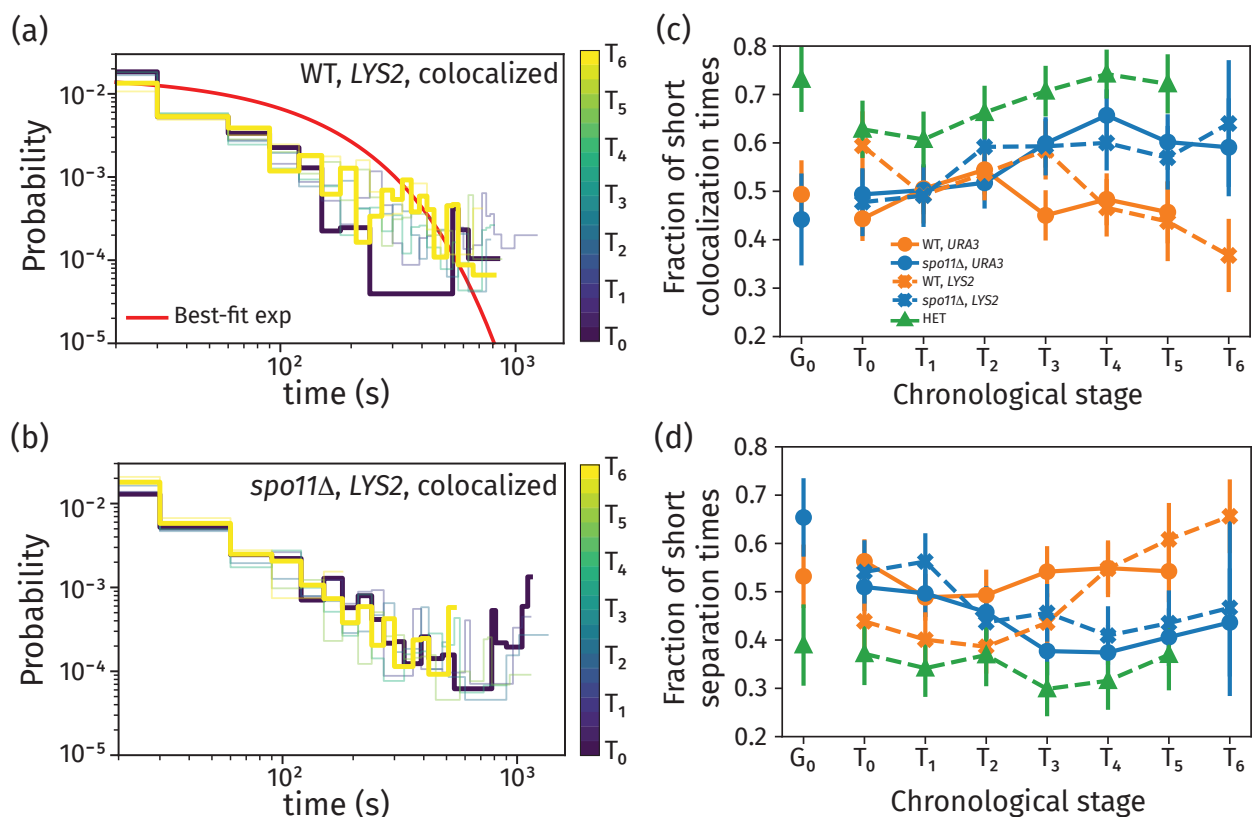

**Fig. 8.** Histograms of dwell times in the colocalized and separated states for the *LYS2* locus. One histogram per stage in meiosis is shown, colored by the time since transfer to sporulation media. Experimental data is shown for the colocalized state, including data for wild-type (a) and *spo11Δ* (b) strains, and separated state for wild-type (c) and *spo11Δ* (d) strains. The red curve in (a) shows the best-fit exponential distribution to the data.

intra-chain processes between polymers due to the inherent spectrum of conformational relaxation times (42), which is consistent with the theoretical model presented in this work.

While the general trends in the dwell-time distributions are similar for wild-type and *spo11Δ* strains, we note several important distinctions. The colocalization dwell-time distribution for wild-type cells (Fig. 8a) exhibits a marked progression through meiosis (from  $T_0$  in purple to  $T_6$  in yellow) towards favoring longer dwell times in the colocalized state, marked by a long-time tail in the distribution for  $T_6$ . This trend is apparent as a reduced fraction of short colocalization times (i.e. the probability for times less than 30 seconds) over the course of meiosis at the *LYS2* and *URA3* loci in wild-type cells (Fig. 8c). In contrast, *spo11Δ* cells, and cells with tags on heterologous chromosomes (also see Supplementary Figure S10), showed a higher fraction of short dwell times later in meiosis (Fig. 8c).

## Discussion

**Locus “pairing” is a thermally-dominated process.** Earlier studies have used a static “one-spot, two-spot” measurements to analyze the colocalization of individual loci (5, 39). In these previous studies, colocalized loci were called “paired”, and the DSB-dependence of this pairing led many to speculate that it may be critical for the progression of whole-length homolog pairing (3, 4, 19). It was demonstrated early on (3, 12, 16) that a given locus under study will never be paired in every cell, even late in prophase when homologs are synapsed along their lengths. Here, we extend this idea, observing that the vast majority of so-called paired loci are merely in close spatial proximity, and not actually interacting, no matter what stage of prophase

we observe. Furthermore, we show that, due to the dynamics of the chromatin polymer, a typical locus will naturally fluctuate into and out of proximity with its homologous partner throughout prophase.

Since our frame rate is 1/30 Hz, we cannot rule out the existence of interactions whose effects last less than 30 s, or where the interaction strength is weak enough that it can be drowned out by thermal noise. However, while such interactions may still exist, adding them would (by definition) not affect the output of our model, making it difficult to imagine how such a putative interaction (e.g. repair of DSBs that do not go on to form crossovers) could contribute to the full-length pairing of homologous chromosomes *in vivo*.

Since the chromatin polymer is thermally fluctuating regardless of cell type, we hypothesize that thermal fluctuations may be a dominant player in driving homolog colocalization in other organisms as well. For example, some authors have observed transient locus pairing in *S. pombe* (43), *Drosophila* (44), *C. elegans* (45) and mouse. It would be interesting to see what fraction of these pairing events can be attributed purely to polymer diffusion.

A pairing process primarily driven by diffusion would also provide a simple explanation for other well-conserved phenomena, such as rapid telomere movement (38, 39, 40). Instead of pushing or pulling telomeres together, rapid telomere movement need only increase fluctuations along the polymer in order to facilitate pairing (35, 38).

The cell-to-cell heterogeneity in dynamic behavior arises from the variability in the timing of biological events (e.g. transition from the Rab1 configuration), intrinsic cell-to-cell variability in the diffusivity (46), and the formation of linkages that are randomly positioned along homologous chromosomes. Relating single-cell results (char-

acterized in Fig. 4) to ensemble-average behavior (shown in Fig. 6) is facilitated by our theoretical model, which captures these various contributions using a minimal description of the linked chromosomal dynamics.

**Distal connections can facilitate chromatin organization.** The number of linkages required to explain the observed MSCD seen for the *URA3* and *LYS2* loci at late time points (3.36 and 2.06, respectively) is more consistent with the lower number of crossovers per chromosome compared to the total number of DSBs (47). The measured number of crossovers based on DNA sequencing is  $\sim 2-4$  on chromosome V (on which *URA3* resides) and  $\sim 6-7$  on chromosome II (on which *LYS2* resides) (10, 48, 49). Our model predicts the number of linkages at  $T_5$  for the *URA3* locus to be 3.36, which is consistent with the experimentally determined number of crossovers.

Our model prediction of 2.06 linkages from the *LYS2* data at  $T_6$  is below the experimental number of crossovers of  $\sim 6-7$  on chromosome II. One potential explanation for the reduced number may be that the dynamics (as determined by the subdiffusion coefficient) is significantly lower for *LYS2* than for *URA3* (see Supplementary Information Fig. S7 for plot of subdiffusion coefficient).

The distance between linkages predicted by our model for chromosome V is consistent with the placement of interactions every  $\sim 60-80$  kb estimated by Weiner and Kleckner (3). Moreover, it reflects the approximate distance at which crossovers are positioned along the lengths of homolog pairs ( $\sim 70-100$  kb), which is influenced by crossover interference (50).

The number of linkages required also highlights just how much distant chromosomal junctions can affect the diffusive dynamics of a locus. We hypothesize that other processes that rely on chromosome rearrangement may exploit these same physics. For example, enhancer loop formation has been proposed to be facilitated by TAD formation (51). Our data suggests that, in this case, tracking the loci of interest (e.g. the enhancer/promoter pair) over a long enough time frame should be sufficient to extract their connectivity (e.g. TAD size) on a single-cell level, even if the distal connections joining the loci of interest are hundreds of kilobases downstream.

**Heavy-tailed co-localization times are likely rate-limiting for meiotic progression.** Our experimentally observed dwell time distributions (Fig. 8) differ drastically from what one would expect if loci were brought into proximity by other means besides polymer diffusion. Suppose, for example, that there was an active mechanism pulling homologous loci together. If the active mechanism was rate-limiting by some chemical step (i.e. kinetics dominated by a single reaction), then we would expect the dwell times to follow an exponential distribution (52, 53). While some limiting cases for polymer looping times also produce exponential distributions (42), we instead observe the kind of power-law falloff at long times characteristic of a diffusion-limited process. That is, our distributions are significantly more heavy-tailed than one would expect from a reaction-limited process (shown as the red curve in Fig. 8a).

Our model suggests that the reorganization dynamics are largely driven by random diffusion. Our results also suggest that once any homolog pair does manage to interact, then that initial connection between the chromosomes will greatly facilitate the interaction of other homologous loci. This suggests that homolog pairing might happen via a positive feedback mechanism (such as the one proposed in Refs. (35, 36, 54, 55)) wherein each random homologous interaction event decreases the colocalization time for all subsequent homologous interactions, allowing the chromosomes to zipper up significantly

faster than would be suggested by the single-homolog colocalization time distribution.

Given how well-aligned the homologous chromosomes are during the G0 phase preceding meiosis (due to the combination of Rab1 configuration and DSB-independent interhomolog connections (24)), even a small handful of connections that persist into meiotic prophase I would be enough to drastically reduce the expected colocalization time for the first genuine DSB-mediated homologous connection.

## Conclusions

We show here that the process of homolog pairing in meiosis is more dynamic than expected from previous observations of static “snapshots” of pairing. We found a large degree of heterogeneous behavior by measuring the mean-squared change in distance of tagged chromosome pairs in individual cells versus ensemble averages. A minimal polymer model reproduces the inter-locus dynamics in premeiotic cells where chromosomes are constrained by the Rab1 configuration. The model can also reproduce the physical linkages between homolog pairs that are mediated by the formation and repair of Spo11-induced double strand breaks. These findings highlight how coarse-grained modeling of the basic polymer physics driving chromatin motion can be a powerful tool when dealing with complex structural and organizational rearrangements in the nucleus.

## Materials and methods

**Time course.** All yeast strains used were in the SK1 background and are listed in Supp. Fig. S8. Cell synchronization and meiotic induction was performed as described previously (28). Every hour after transfer to sporulation medium, slides were prepared for imaging according to (56), using silicone isolators (Cat. no. JTR20R-2.0, Grace Bio Labs). All of our image processing code is available at <https://github.com/ucdavis/SeeSpotRun>.

**Imaging.** Imaging was performed on a Marianas real time confocal workstation with mSAC + mSwitcher (3i), using a CSU-X1, micro-lens enhanced, spinning disk unit (Yokogawa). All imaging was performed in a full enclosure environmental chamber preheated to  $30^\circ\text{C}$ , using a microscope incubator (Okolab). Samples were excited with a LaserStack 488 nm line (3i), observed using an ALPHA PLAN APO 100X/1.46 OIL objective lens (Zeiss), and photographed using a Cascade QuantEM 512SC camera (Photometrics), with a  $0.133\ \mu\text{m}$  pixel size. Samples were kept in focus using Definite Focus (Zeiss), capturing up to 41 z-sections (as required to acquire the complete sample thickness), with a  $0.25\ \mu\text{m}$  step size, every 30 s for 50 time points (a total of 25 min). Slidebook v5 (3i) was used to run the time-lapse live-cell imaging and export each plane as a separate 16-bit .tiff file.

**Video quality control.** Videos were excluded from analysis if the quality was so poor as to affect subsequent analysis, with assessments based on signal to noise, signal bleaching, and drift in the z and xy dimensions (Supp. Fig. S9a-c). If drift occurred only at the start or end of the video, and was sufficient to affect image segmentation, then the problematic frames were trimmed from the video. Manual cell segmentation, was performed from a zt-MIP (maximum intensity projection, over the z and t dimensions) using `dist3D_gui.m`, while referring back to the z-MIP video, ignoring overlapping cells and those at the edge of the field of view. Qualitative observations of cell quality were made by referring to the z-MIP video and the position of each cropped cell. Only cells deemed “okay” (Supp. Fig. S9d-j) were



562 included in the subsequent analysis. For inclusion, videos required  
563 twice as many live cells as dead ( $\text{dead/live} < 0.5$ ) and  $> 10$  okay cells.

564 **Spot calling.** The position of the fluorescent foci within each cropped  
565 cell was detected independently for each time point in the video ac-  
566 cording to the algorithm described in (57). The raw image intensity  
567 data from each cropped cell was filtered with a 3D Gaussian kernel  
568 to remove as many noise-related local maxima as possible. Peak lo-  
569 calization (`runSpotAnalysisTest.m`) was performed through local  
570 maxima detection in 3D using image dilation, followed by curvature  
571 measurement, which allowed significant peaks to be identified through  
572 a cumulative histogram thresholding method. The computational spot  
573 calling was manually confirmed in order to remove obvious errors  
574 (Supp. Fig. S10–S11) using `conf_gui.m`. If the fitting routine failed  
575 to find peaks in more than half the time points for any given cell, that  
576 cell was omitted from the analysis.

577 **Experiment quality control.** Experiments with a very poor overall  
578 agreement between computational and manual spot calling, with an  
579 average difference between detection methods of greater than 10 %  
580 at each meiotic timepoint, were excluded from analysis. The manual  
581 analysis was performed by calling cells as having one or two spots  
582 based on a visual assessment of a z-MIP, this was done for three  
583 time points from each  $T_M$ . Whole experiments were also excluded  
584 from the final dataset if the meiotic pairing progression could not be  
585 confirmed to exhibit various characteristic properties, such as a single,  
586 appropriately timed “nadir”. This was typically due to an experiment  
587 lacking sufficient  $T_M$  due to exclusion of individual videos.

588 **Trajectory Analysis.** Downstream analysis of the ex-  
589 tracted trajectories was performed using a custom Python  
590 package (`multi_locus_analysis (mla) v.0.0.22`, see:  
591 <https://multi-locus-analysis.readthedocs.io/en/latest/>). Dwell times  
592 were corrected for finite window effects using the method described  
593 in (58). Details of the analysis and code used to make plots can be  
594 found in the package documentation.

595 **Analytical Theory.** The code used to compute the analytical MSCD  
596 curves can also be found in the `wlcsim` codebase under the  
597 `wlcsim.analytical.homolog` module (for documentation, see  
598 <https://wlcsim.readthedocs.io>). Briefly, the MSCD calculation is  
599 broken down into two cases. In the case where the loci are in between  
600 two linkage sites, we treat them as being on an isolated ring polymer  
601 whose size is chosen to match the effective ring formed by the two  
602 homologous segments holding each locus (which are tethered at either  
603 end by the linkage site). This effective ring is outlined in white for  
604 cells 1 and 4 in Fig. 5. Otherwise, we treat the loci as being on an iso-  
605 lated linear polymer meant to represent the segment of chain running  
606 from the end of the first chromosome to one locus, then from that loci  
607 to the linkage site, from the linkage site to the other loci, and finally  
608 from that loci to the end of the second chromosome. Supplementary  
609 Information provides a detailed derivation of the MSCD for these two  
610 cases and the value of the plateau MSCD for spherical confined of the  
611 polymers.

612 **Statistics.** Unless otherwise indicated, variation was measured be-  
613 tween experimental replicates for each condition using: Jeffrey’s 95%  
614 confidence intervals (CI) for proportion response variables (fraction  
615 paired, cell type) or standard error of the mean (SEM) for continuous  
616 response variables (distance, MSCD).

**Data availability.** The raw image data was deposited to the Image  
Data Resource (<http://idr.openmicroscopy.org>) under accession num-  
ber idr0063. The scripts required to reproduce the processed data are  
available on GitHub[da] (<https://github.com/ucdavis/SeeSpotRun>);  
this includes the MATLAB interfaces for spot calling, and the Python  
scripts for preparing the final xyz position dataset (see Supplementary  
Dataset 1: `finalxyz.csv`). The Python module used for downstream  
analysis also contains the final dataset used in the present study, and  
can be downloaded from the standard Python repositories by executing  
`pip install multi_loci_analysis`.

## ACKNOWLEDGMENTS.

We thank the lab of Angelika Amon for our FROS strains. This work was  
supported by The National Institutes of Health (NIH), grant: R01GM075119.  
We thank the Light Microscopy Imaging Facility (Molecular and Cellular  
Biology, UC, Davis). Financial support for A. J. S. is provided by the National  
Science Foundation, Physics of Living Systems Program (PHY-1707751). B.  
B. acknowledges funding support from the NSF Graduate Fellowship program  
(DGE-1656518) and from an NIH training grant (T32GM008294).

1. Antonarakis SE, et al. (1992) The Meiotic Stage of Nondisjunction in Trisomy 21: Determination by Using DNA Polymorphisms. *The American Journal of Human Genetics* 50:544–550.
2. Nagaoka SI, Hassold TJ, Hunt PA (2012) Human aneuploidy: Mechanisms and new insights into an age-old problem. *Nature Reviews Genetics* 13(7):493–504.
3. Weiner BM, Kleckner N (1994) Chromosome Pairing via Multiple Interstitial Interactions before and during Meiosis in Yeast. *Cell* 77:977–991.
4. Cha RS, Weiner BM, Keeney S, Dekker J, Kleckner N (2000) Progression of meiotic DNA replication is modulated by interchromosomal interaction proteins, negatively by Spo11p and positively by Rec8p. *Genes & Development* 14:493–503.
5. Brar GA, Hochwagen A, Ee LS, Amon A (2009) The Multiple Roles of Cohesin in Meiotic Chromosome Morphogenesis and Pairing. *Molecular Biology of the Cell* 20(3):1030–1047.
6. Brown MS, Zanders S, Alani E (2011) Sustained and rapid chromosome movements are critical for chromosome pairing and meiotic progression in budding yeast. *Genetics* 188(1):21–32.
7. Keeney S, Giroux CN, Kleckner N (1997) Meiosis-Specific DNA Double-Strand Breaks Are Catalyzed by Spo11, a Member of a Widely Conserved Protein Family. *Cell* 88(3):375–384.
8. Keeney S, Lange J, Mohibullah N (2014) Self-organization of meiotic recombination initiation: general principles and molecular pathways. *Annual review of genetics* 48:187–214.
9. Zickler D, Kleckner N (2015) Recombination, Pairing, and Synapsis of Homologs during Meiosis. *Cold Spring Harbor Perspectives in Biology* 7(6):a016626.
10. Krishnaprasad GN, et al. (2015) Variation in Crossover Frequencies Perturb Crossover Assurance Without Affecting Meiotic Chromosome Segregation in *Saccharomyces cerevisiae*. *Genetics* 199(2):399–412.
11. Burgess SM (2002) Homologous chromosome associations and nuclear order in meiotic and mitotically dividing cells of budding yeast. *Advances in genetics* 46:49–90.
12. Loidl J, Klein F, Scherthan H (1994) Homologous pairing is reduced but not abolished in asynaptic mutants of yeast. *The Journal of Cell Biology* 125(6):1191–1200.
13. Peoples TL, Dean E, Gonzalez O, Lambourne L, Burgess SM (2002) Close, stable homolog juxtaposition during meiosis in budding yeast is dependent on meiotic recombination, occurs independently of synapsis, and is distinct from DSB-independent pairing contacts. *Genes & Development* 16(13):1682–1695.
14. Dekker J, Rippe K, Dekker M, Kleckner N (2002) Capturing Chromosome Conformation. *Science* 295(5558):1306–1311.
15. Kim S, et al. (2017) The dynamic three-dimensional organization of the diploid yeast genome. *eLife* 6.
16. Lee CY, Conrad MN, Dresser ME (2012) Meiotic Chromosome Pairing Is Promoted by Telomere-Led Chromosome Movements Independent of Bouquet Formation. *PLoS Genetics* 8(5):e1002730.
17. Fuchs J, Lorenz A, Loidl J (2002) Chromosome associations in budding yeast. *Journal of Cell Science* 115(6):1213–1220.
18. Mirkin EV, Chang FS, Kleckner N (2014) Protein-Mediated Chromosome Pairing of Repetitive Arrays. *Journal of Molecular Biology* 426(3):550–557.
19. Kleckner N, Weiner B (1993) Potential Advantages of Unstable Interactions for Pairing of Chromosomes in Meiotic, Somatic, and Premeiotic Cells. *Cold Spring Harbor Symposia on Quantitative Biology* 58(0):553–565.
20. Padmore R, Cao L, Kleckner N (1991) Temporal comparison of recombination and synaptonemal complex formation during meiosis in *S. cerevisiae*. *Cell* 66(6):1239–1256.
21. Tesse S, Storzazzi A, Kleckner N, Gargano S, Zickler D (2003) Localization and roles of Ski8p protein in *Sordaria* meiosis and delineation of three mechanistically distinct steps of meiotic homolog juxtaposition. *Proceedings of the National Academy of Sciences* 100(22):12865–12870.
22. Börner G, Kleckner N, Hunter N (2004) Crossover/Noncrossover Differentiation, Synaptonemal Complex Formation, and Regulatory Surveillance at the Leptotene/Zygotene Transition of Meiosis. *Cell* 117(1):29–45.
23. Jin QW, Fuchs J, Loidl J (2000) Centromere clustering is a major determinant of yeast interphase nuclear organization. *Journal of cell science* 113(11):1903–1912.
24. Burgess SM, Kleckner N, Weiner BM (1999) Somatic pairing of homologs in budding yeast: Existence and modulation. *Genes & Development* 13(12):1627–1641.
25. Obeso D, Dawson DS (2010) Temporal characterization of homology-independent centromere coupling in meiotic prophase. *PLoS one* 5(4):e10336.

- 695 26. Trelles-Sticken E, Loidl J, Scherthan H (1999) Bouquet formation in budding yeast: initiation  
696 of recombination is not required for meiotic telomere clustering. *Journal of Cell Science*  
697 112(5):651–658.
- 698 27. Serrentino ME, Borde V (2012) The spatial regulation of meiotic recombination hotspots: are  
699 all dsb hotspots crossover hotspots? *Experimental cell research* 318(12):1347–1352.
- 700 28. Lui D, Burgess SM (2009) Measurement of spatial proximity and accessibility of chromoso-  
701 mal loci in *Saccharomyces cerevisiae* using cre/loxP site-specific recombination in *Meiosis:*  
702 *Volume 1, Molecular and Genetic Methods*, ed. Keeney S. (Humana Press, Totowa, NJ), pp.  
703 55–63.
- 704 29. Miné-Hattab J, Rothstein R (2012) Increased chromosome mobility facilitates homology  
705 search during recombination. *Nature cell biology* 14(5):510–517.
- 706 30. Weber SC, Spakowitz AJ, Theriot JA (2010) Bacterial Chromosomal Loci Move Subdiffusively  
707 through a Viscoelastic Cytoplasm. *Physical Review Letters* 104(23).
- 708 31. Weber SC, Thompson MA, Moerner WE, Spakowitz AJ, Theriot JA (2012) Analytical tools to  
709 distinguish the effects of localization error, confinement, and medium elasticity on the velocity  
710 autocorrelation function. *Biophysical Journal* 102(11):2443–2450.
- 711 32. Weber SC, Spakowitz AJ, Theriot JA (2012) Nonthermal atp-dependent fluctuations con-  
712 tribute to the in vivo motion of chromosomal loci. *Proceedings of the National Academy*  
713 *of Sciences* 109(19):7338–7343.
- 714 33. Ghosh RP, et al. (2019) A fluorogenic array for temporally unlimited single-molecule tracking.  
715 *Nature chemical biology* 15(4):401–409.
- 716 34. Hajjoul H, et al. (2013) High-throughput chromatin motion tracking in living yeast reveals the  
717 flexibility of the fiber throughout the genome. *Genome Research* 23(11):1829–1838.
- 718 35. Marshall WF, Fung JC (2016) Modeling meiotic chromosome pairing: Nuclear envelope at-  
719 tachment, telomere-led active random motion, and anomalous diffusion. *Physical Biology*  
720 13(2):026003.
- 721 36. Marshall WF, Fung JC (2019) Modeling meiotic chromosome pairing: A tug of war between  
722 telomere forces and a pairing-based Brownian ratchet leads to increased pairing fidelity. *Phys-*  
723 *ical Biology* 16(4):046005.
- 724 37. Doi M, Edwards SF, Edwards SF (1988) *The theory of polymer dynamics*. (oxford university  
725 press) Vol. 73.
- 726 38. Lee CY, et al. (2015) Mechanism and regulation of rapid telomere prophase movements in  
727 mouse meiotic chromosomes. *Cell reports* 11(4):551–563.
- 728 39. Conrad MN, et al. (2008) Rapid Telomere Movement in Meiotic Prophase Is Promoted By  
729 NDJ1, MP53, and CSM4 and Is Modulated by Recombination. *Cell* 133(7):1175–1187.
- 730 40. Wang X, et al. (2008) Rapid telomere motions in live human cells analyzed by highly time-  
731 resolved microscopy. *Epigenetics & Chromatin* 1:4.
- 732 41. Chu FY, Haley SC, Zidovska A (2017) On the origin of shape fluctuations of the cell nucleus.  
733 *Proceedings of the National Academy of Sciences* 114(39):10338–10343.
- 734 42. Wilemski G, Fixman M (1974) Diffusion-controlled intrachain reactions of polymers. I Theory.  
735 *The Journal of Chemical Physics* 60(3):866–877.
- 736 43. Chacón MR, Delivani P, Tolić IM (2016) Meiotic Nuclear Oscillations Are Necessary to Avoid  
737 Excessive Chromosome Associations. *Cell Reports* 17(6):1632–1645.
- 738 44. Vazquez J, Belmont AS, Sedat JW (2002) The dynamics of homologous chromosome pairing  
739 during male *Drosophila* meiosis. *Current biology: CB* 12(17):1473–1483.
- 740 45. Wynne DJ, Rog O, Carlton PM, Dernburg AF (2012) Dynein-dependent processive chromo-  
741 some motions promote homologous pairing in *C. elegans* meiosis. *The Journal of Cell Biology*  
742 196(1):47–64.
- 743 46. Lampo TJ, Stylianidou S, Backlund MP, Wiggins PA, Spakowitz AJ (2017) Cytoplasmic  
744 RNA-Protein Particles Exhibit Non-Gaussian Subdiffusive Behavior. *Biophysical Journal*  
745 112(3):532–542.
- 746 47. Pan J, et al. (2011) A hierarchical combination of factors shapes the genome-wide topography  
747 of yeast meiotic recombination initiation. *Cell* 144(5):719–731.
- 748 48. Mancera E, Bourgon R, Brozzi A, Huber W, Steinmetz LM (2008) High-resolution mapping of  
749 meiotic crossovers and non-crossovers in yeast. *Nature* 454(7203):479–485.
- 750 49. Qi J, et al. (2009) Characterization of meiotic crossovers and gene conversion by whole-  
751 genome sequencing in *Saccharomyces cerevisiae*. *BMC Genomics* 10(1):475.
- 752 50. Cooper TJ, Garcia V, Neale MJ (2016) Meiotic dsb patterning: A multifaceted process. *Cell*  
753 *cycle* 15(1):13–21.
- 754 51. Galupa R, Crocker J (2020) Enhancer–Promoter Communication: Thinking Outside the TAD.  
755 *Trends in Genetics* 0(0).
- 756 52. Doob JL (1942) TOPICS IN THE THEORY OF MARKOFF CHAINS. *Trans. Amer. Math. Soc.*  
757 52:37–64.
- 758 53. Gillespie DT (1977) Exact stochastic simulation of coupled chemical reactions. *The Journal*  
759 *of Physical Chemistry* 81(25):2340–2361.
- 760 54. Lewis EB (1954) The Theory and Application of a New Method of Detecting Chromosomal  
761 Rearrangements in *Drosophila melanogaster*. *The American Naturalist* 88(841):225–239.
- 762 55. Loidl J (1990) The initiation of meiotic chromosome pairing: The cytological view. *Genome*  
763 33(6):759–778.
- 764 56. Dresser ME (2009) Time-Lapse Fluorescence Microscopy of *Saccharomyces cerevisiae* in  
765 Meiosis in *Meiosis*, ed. Keeney S. (Humana Press, Totowa, NJ) Vol. 558, pp. 65–79.
- 766 57. Thomann D, Rines DR, Sorger PK, Danuser G (2002) Automatic fluorescent tag detection in  
767 3D with super-resolution: Application to the analysis of chromosome movement. *Journal of*  
768 *Microscopy* 208(1):49–64.
- 769 58. Beltran B, MachPherson Q, Spakowitz AJ (2020) Waiting Times from Finite Trajectories. *In*  
770 *Preparation*.
